# Supplementary material for: MiR-190 ameliorates glucotoxicity-induced dysfunction and apoptosis of pancreatic β-cells by inhibiting NOX2-mediated reactive oxygen species production
Source: PeerJ. 2022 Aug 10;10:e13849. doi: 10.7717/peerj.13849 (PMC9375543; doi:10.7717/peerj.13849)
Supplement: Data S1 — The raw data file can be opened in Excel. [file peerj-10-13849-s005.xlsx]

## Sheet: Figure1
Fig1B	Average Intensity
	1	2	3	4	5	AVE	P value
LG	0.921875	1.01562	1.01562	1.03125	1.01562	1	0.00105557
HG	0.84375	0.765625	0.765625	0.84375	0.65625	0.775	**
Fig1C	Relative expression of insulin
	1	2	3	AVE	P value
LG	1.01198	1.07544	0.912589	1	0.000214241
HG	0.386543	0.386543	0.399079	0.390722	***
Fig1D	Insulin secretion
	ng/ug of total protein			ng/ug of total protein
LG-Basal-1	0.0635141		HG-Basal-1	0.116754
LG-Basal-2	0.0946397		HG-Basal-2	0.137142
LG-Basal-3	0.103317		HG-Basal-3	0.127337
LG-GSIS-1	0.178357		HG-GSIS-1	0.131631
LG-GSIS-2	0.173567		HG-GSIS-2	0.138571
LG-GSIS-3	0.190204		HG-GSIS-3	0.165638
	LG-Basal	LG-GSIS	HG-Basal	HG-GSIS
AVE	0.0871568	0.18071	0.127078	0.14528
	P Value			P Value
LG-Basal Vs LG-GSIS	0.00200826	**	HG-Basal Vs HG-GSIS	0.201715	N.S
LG-Basal Vs HG-Basa	0.0411462	*	LG-GSIS Vs HG-GSIS	0.0368278	*
Fig1F	relative insulin fluorescence intensity
miRNA	let-7c	449a	222	411	199a-5p	9*	30d	100	29a	10b	196b	125a	187	19a	24	135a	10a*	let-7f	34a	127-3p	1	NC	496	9	154	760	let-7a	29b	27b	15a	499-5p	93	20a	200a	30e	302a	744*	193a	23b	125a-3p	10a	873	142-5P	200c	16	29a*	30a	146b-5p	381
A	1.1	1.07243	1.20051	1.10758	1.09881	1.14619	1.13717	1.10541	1.12809	1.12919	1.15355	1.15477	1.21227	1.16818	1.07781	1.10084	1.11353	1.17357	1.166	1.14421	1.14545	1.0905	1.11399	1.12939	1.18984	1.16755	1.12332	1.18286	1.12742	1.19159	1.18217	1.19957	1.12155	1.20365	1.26505	1.25537	1.28398	1.33692	1.30426	1.39631	1.30418	1.3819	1.46124	1.41656	1.46601	1.42565	1.49947	1.43014	1.54733
B	0.89	0.910031	0.896006	0.928936	0.935056	0.922888	0.928749	0.941653	0.934559	0.935659	0.930244	0.931465	0.914535	0.929986	0.95871	0.951974	0.949774	0.935375	0.942696	0.950681	0.951918	0.971404	0.965126	0.965635	0.951654	0.959131	0.974456	0.959558	0.978555	0.96829	0.97375	0.97627	1.00245	0.980344	0.99709	1.07672	1.10533	1.11362	1.12561	1.09858	1.14042	1.12882	1.13373	1.1486	1.1385	1.18746	1.17196	1.20683	1.17516
C	0.84679	0.864612	0.810845	0.878974	0.889258	0.860437	0.870461	0.895855	0.880434	0.881534	0.867792	0.869013	0.831266	0.863371	0.925403	0.91034	0.903976	0.86876	0.880244	0.896556	0.897793	0.938097	0.923491	0.919837	0.885039	0.900842	0.932821	0.897106	0.93692	0.905838	0.915462	0.913818	0.969145	0.917892	0.922148	1.02676	1.05537	1.05117	1.07565	1.01531	1.09462	1.05805	1.04213	1.07365	1.04691	1.12084	1.08036	1.14438	1.07107
AVE	0.945597	0.949026	0.969121	0.97183	0.974376	0.976506	0.978792	0.980972	0.981027	0.982128	0.983861	0.985082	0.986025	0.987178	0.987306	0.987719	0.989093	0.992567	0.996313	0.997149	0.998386	1	1.00087	1.00495	1.00885	1.00917	1.0102	1.01318	1.0143	1.02191	1.02379	1.02989	1.03105	1.03396	1.06143	1.11962	1.14823	1.16724	1.16851	1.17007	1.17974	1.18959	1.21237	1.21294	1.21714	1.24465	1.2506	1.26045	1.26452
STD	0.135451	0.109261	0.204864	0.120187	0.110171	0.150234	0.140218	0.110171	0.130203	0.130203	0.150234	0.150234	0.200312	0.160249	0.0801246	0.100156	0.110171	0.160249	0.150234	0.130203	0.130203	0.0801246	0.100156	0.110171	0.160249	0.140218	0.100156	0.150234	0.100156	0.150234	0.140218	0.150234	0.0801246	0.150234	0.18028	0.120187	0.120187	0.150234	0.120187	0.200312	0.110171	0.170265	0.220343	0.18028	0.220343	0.160249	0.220343	0.150234	0.250389
P Value	0.581595	0.550184	0.81986	0.752505	0.760908	0.822852	0.831225	0.820731	0.840322	0.849421	0.877557	0.886729	0.916072	0.90733	0.855608	0.876328	0.896407	0.946163	0.971879	0.975781	0.986289	1	0.991183	0.952793	0.93596	0.92636	0.897096	0.899853	0.856287	0.834565	0.811165	0.77626	0.659825	0.747138	0.618276	0.224791	0.150139	0.164116	0.113426	0.243889	0.0842919	0.15591	0.191761	0.134914	0.183955	0.0772315	0.137785	0.0570123	0.156338
Fig1G	relative expression of miRNA
	miR-190	miR-200c*	let-7i		AVE
LG	0.909331	0.907901	0.975409			LG	HG
	1.00478	1.18231	1.13138		miR-190	1	0.493368
	1.08589	0.909791	0.893215		miR-200c*	1	1.29095
HG	0.502273	1.27039	0.90673		let-7i	1	0.919798
	0.495015	1.36252	0.824017
	0.482816	1.23994	1.02865
P Value（LG Vs HG)	0.000591571	0.0415885	0.431182
	***	*	N.S
Fig1H	Relative expression of insulin
	HG-NC	HG-miR-190	HG-miR-200C*	HG-let-7i
	1.10593	1.69068	1.10593	1.24576
	0.978814	1.74153	1.29661	1.43644
	0.915254	1.88136	1.16949	1.5
AVE	1	1.77119	1.19068	1.39407
P Value（one way annova）		＜0.001	0.1419	0.0052
		***	N.S	**
[truncated: 15 more columns]

## Sheet: Figure2
Fig2A	Relative expression of miR-190
	0h	24h	48h	72h
1	0.95235	0.81674	0.45981	0.33232
2	0.92224	0.83526	0.37462	0.37892
3	1.12624	0.74452	0.42115	0.42325
AVE	1.00028	0.79884	0.418527	0.378163
STD	0.110121	0.0479452	0.0426555	0.0454697
P Value （one way anova）		0.0164	＜0.0001	＜0.0001
		*	***	***
Fig2B	Relative expression of miR-190
C57-1-1	1.01967	DB/DB-1-1	0.274454	OB/OB-1-1	0.3375
C57-1-2	0.912987	DB/DB-1-2	0.244439	OB/OB-1-2	0.229054
C57-1-3	0.968007	DB/DB-1-3	0.211595	OB/OB-1-3	0.280227
C57-2-1	0.787648	DB/DB-2-1	0.402161	OB/OB-2-1	0.376379
C57-2-2	0.915996	DB/DB-2-2	0.323526	OB/OB-2-2	0.453518
C57-2-3	0.775007	DB/DB-2-3	0.375511	OB/OB-2-3	0.422947
C57-3-1	1.20282	DB/DB-3-1	0.0307768	OB/OB-3-1	0.179664
C57-3-2	1.27792	DB/DB-3-2	0.0380841	OB/OB-3-2	0.218288
C57-3-3	1.13994	DB/DB-3-3	0.0406863	OB/OB-3-3	0.165341
AVE	1		0.215692		0.29588
STD	0.176677		0.146885		0.106352
P Value（one way anova)			＜0.0001		＜0.0001
			***		***
Fig2D
	ng/ug of total protein			ng/ug of total protein
HG-NC-Basal-1	0.148684		HG-190-Basal-1	0.103999
HG-NC-Basal-2	0.12704		HG-190-Basal-2	0.0722031
HG-NC-Basal-3	0.125653		HG-190-Basal-3	0.0972707
HG-NC-basal-4	0.175781		HG-190-GSIS-2	0.208335
HG-NC-GSIS-1	0.13085		HG-190-GSIS-3	0.181797
HG-NC-GSIS-2	0.16375		HG-190-GSIS-4	0.206639
HG-NC-GSIS-3	0.17136
AVE-NC-Basal	0.144289		AVE-190-Basal	0.0911575
AVE-NC-GSIS	0.15532		AVE-190-GSIS	0.198924
P Value
NC-basal Vs NC-GSIS	0.211683	N.S	190-Basal Vs 190-GSIS	0.0011322	**
NC-Basal Vs 190-Basa	0.0251101	*	NC-GSIS Vs 190-GSIS	0.0223458	*

## Sheet: Figure3
Fig 3B	ROS production
	LG	HG	HG-NC	HG-miR-190
1	1.01667	1.42614	1.35044	1.11927
2	1.10229	1.40292	1.51992	0.998212
3	0.881036	1.31139	1.37769	1.01283
STD	1	1.38015	1.41602	1.04344
	0.111566	0.0606713	0.0910076	0.0660803
P value		0.00658495		0.00457028
		**		**
Fig3D
	AKT			p-AKT			p-AKT/AKT			AKT			p-AKT			p-AKT/AKT
	LG	HG		LG	HG		LG	HG		HG-NC	HG-miR-190		HG-NC	HG-miR-190		HG-NC	HG-miR-190
	1	0.9023		1	0.6359		1	0.704755		1	0.906		1	1.393		1	1.53753
	1	1.3302		1	0.7624		1	0.573147		1	1.135		1	1.532		1	1.34978
	1	0.9234		1	0.4324		1	0.468269		1	1.074		1	1.222		1	1.1378
AVE	1	1.05197		1	0.610233		1	0.582057		1	1.03833		1	1.38233		1	1.3417
STD	0	0.241188		0	0.16649		0	0.118494		0	0.118593		0	0.155275		0	0.199985
P value		0.727942	N.S		0.0154138	*		0.00363392	**		0.605445	N.S		0.0130036	*		0.0415766	*
	P38			p-P38			p-P38/P38			P38			p-P38			p-P38/P38
	LG	HG		LG	HG		LG	HG		HG-NC	HG-miR-190		HG-NC	HG-miR-190		HG-NC	HG-miR-190
	1	1.375		1	3.14894		1	2.29014		1	0.893		1	0.782975		1	0.876792
	1	1.042		1	1.96433		1	1.88515		1	1.132		1	0.57418		1	0.507226
	1	0.905		1	2.1634		1	2.3905		1	1.288		1	0.827428		1	0.642413
AVE	1	1.10733		1	2.42556		1	2.1886		1	1.10433		1	0.728195		1	0.675477
STD	0	0.241715		0	0.634328		0	0.267538		0	0.198948		0	0.13522		0	0.186988
P value		0.484723	N.S		0.0176529	*		0.00153438	**		0.415081	N.S		0.0253151	*		0.0397058	*

## Sheet: Figure4
Fig4B	luciferase assay
	PGL3-Cybb-WT	PGL3-Cybb-MUT
NC-1	0.958268	0.832305
NC-2	1.34459	1.03439
NC-3	0.969759	1.06125
NC-4	0.727379	1.07206
miR-190-1	0.325437	0.899087
miR-190-2	0.317074	0.819766
miR-190-3	0.352673	0.749249
miR-190-4	0.338989	0.912467
				0.255423	0.112913
NC	1	1		0.0156263	0.0758994
190	0.333543	0.845142
p-Value	0.00199789	0.063106
	**	N.S
Fig4C	Cybb RT-PCR
	relative expression of Cybb			AVE	P value
HG-NC-Cybb	1.09134	0.911363	0.997299	1
HG-190-Cybb	0.480552	0.656453	0.575451	0.570819	0.00411945	**

## Sheet: Figure5
Fig5A	expression of Cybb
	LG	HG		HG-NC	HG-miR-190
	1.04967	1.2321		1.3598	0.768467
	0.900563	1.2392		1.23404	1.1251
	1.04977	1.1249		1.2954	0.8011
	1.02974	1.49032		1.91315	0.988025
	0.881044	1.66742		1.73502	0.837185
	1.08921	1.73944		1.93852	1.31642
AVE	1	1.41556		1.57932	0.972716
	LG Vs HG			HG-NC Vs HG-190
P value(TTEST)	0.00866829			0.00410686
	**			**
P value(Mann-Whitney test)	0.0022			0.0087
	**			**
Fig5B
LG	HG	HG-NC	HG-miR-190
1	2.377	2.882	1.599
1	2.203	2.302	1.367
1	1.903	2.128	1.453
1	2.161	2.43733	1.473
0	0.239775	0.394798	0.117286
	0.00110589		0.0154053
	**		*
Fig5C	Expression of Cybb
				AVE	STD	P value
NC	0.93	1.12	0.95	1	0.104403
si-Cybb	0.45	0.32	0.53	0.433333	0.105987	0.00273486	**
Fig5D	Protein level of gp91 phox
				AVE	STD	P value
NC	1	1	1	1	0
si-Cybb	0.724	0.399	0.509	0.544	0.165303	0.00878845	**
Fig5E
									AVE	STD	p-value
NC-1	0.846859	1.00032	1.29975	0.739695	0.990086	0.952939	1.16137	1.00899	1	0.172996
si-Cybb	0.660365	0.905381	0.672193	0.859759	0.82671	0.852793	0.794835	0.812304	0.798043	0.0879585	0.0106859	*
Fig5G	Expression of insulin
					AVE	STD	P Value
NC-1	1.13962	0.912282	1.11385	0.83425	1	0.150136
si-Cybb	1.27881	1.22078	1.42583	1.28592	1.30284	0.0870331	0.0129814	*
Fig5H	insulin secretion
	HG-NC			AVE	STD		p value
Basal	0.121399	0.105198	0.141454	0.122684	0.0181623	NC-Basal VS NC GSIS	0.716708	N.S
GSIS	0.101835	0.149773	0.137215	0.129608	0.0248579
						NC-basal Vs siRNA-basal	0.0134386	*
	HG-si-Cybb
Basal	0.0677925	0.0810312	0.0772898	0.0753712	0.00682471	siRNA-basalVs siRNA-GSIS	0.00192044	**
GSIS	0.184643	0.196802	0.151482	0.177642	0.0234569	NC GSIS Vs siRNA GSIS	0.0358255	*

## Sheet: Figure6
Fig6C	Fasting blood glucose
						AVE	STD	P value
DB-NC	16.8	15.8	14.25	17.9		16.1875	1.55047
DB-190	14.25	10.3	13.25	14.25	13.45	13.1	1.63018	0.0235538	*
						AVE	STD	P value
OB-NC	11.7	15.2	16.2	14.3		14.35	1.92959
OB-190	10.7	10.2	9.6	10.3		10.2	0.454606	0.00576975	**
Fig6D
						AVE	STD	P value
DB-NC	1.38119	0.890127	1.00018	2.03551		1.32675	0.517232
DB-190	0.561373	0.84164	0.561373	0.561373		0.63144	0.140133	0.0409343	*
						AVE	STD	P value
	1.96405	1.04668	1.0713	2.05333		1.53384	0.54961
	0.848113	0.582567	0.870431	0.707346	0.426592	0.68701	0.186237	0.0137252	*
Fig6E	IPGTT
time（min)	0	15	30	60	90	120
NC-1	11.7	23.3	30.1	25.9	25.7	22.1
NC-2	15.2	19.8	25.3	32.1	26.1	18.7
NC-3	16.2	25.1	28.1	26.5	22.1	16.5
NC-4	14.3	21.4	26.9	31.8	21.5	21.7
AVE	14.35	22.4	27.6	29.075	23.85	19.75
190-1	10.7	16.2	19.8	16.8	12.2	10.7
190-2	10.2	13.8	21.1	21.4	14.6	8.9
190-3	9.6	14.6	18.6	17.6	14.7	10.1
190-4	10.3	15.8	18.9	17	13.3	9.1
AVE	10.2	15.1	19.6	18.2	13.7	9.7
TTEST	0.00576975	0.00123019	0.000452382	0.00154585	0.000266228	0.000353638
	**	**	***	**	***	***
Fig6F	Expression of Cybb
	C57	db/db	ob/ob
	0.982	8.491	1.661
	1.128	4.632	1.382
	0.892	4.659	1.549
	1.296	6.733	1.572
	0.702	4.572	0.982
AVE	1	5.8174	1.4292
STD	0.22627	1.75247	0.269579
p Value		0.000290691	0.0259722
		***	*
Fig6G	Expression of Cybb
	DB-NC	DB-190	OB-NC	OB-190
	1.51207	0.384953	0.93777	0.826764
	0.872308	0.559488	0.860625	0.491158
	0.795376	0.559488	0.901191	0.391681
	0.82025	0.586575	1.30041	0.677927
AVE	1	0.522626	1	0.596882
STD	0.342879	0.092666	0.20274	0.19382
p Value		0.0361455		0.0282614
		*		*
